# **Isolation and characterisation of mutants with altered seminal root numbers in hexaploid wheat**

Oluwaseyi Shorinola <sup>†</sup>, Ryan Kaye <sup>§</sup>, Guy Golan<sup>‡</sup>, Zvi Peleg<sup>‡</sup>, Stefan Kepinski <sup>§</sup> and Cristobal Uauy <sup>†</sup>.

<sup>†</sup> Crop Genetics Department, John Innes Centre, Norwich, NR4 7UH, UK.

<sup>§</sup> Centre for Plant Sciences, Faculty of Biological Sciences, University of Leeds, Leeds, LS2 9JT, UK.

<sup>‡</sup>The Robert H. Smith Institute of Plant Sciences and Genetics in Agriculture, The Hebrew University of Jerusalem, Rehovot 7610001, Israel.

**Running title:** Identification of wheat root mutants

**Keyword:** Wheat, Root, TILLING, Mutations, Forward Genetics

**Corresponding Authors:**

**Oluwaseyi Shorinola**, Crop Genetic Department, John Innes Centre, Norwich, NR4 7UH, UK, +44-(0)1603-450000, [Oluwaseyi.Shorinola@jic.ac.uk](mailto:Oluwaseyi.Shorinola@jic.ac.uk)

**Cristobal Uauy**, Crop Genetic Department, John Innes Centre, Norwich, NR4 7UH, UK, +44-(0)1603-450195, [cristobal.uauy@jic.ac.uk](mailto:cristobal.uauy@jic.ac.uk)

## ABSTRACT

The root is the main channel for water and nutrient uptake in plants. Optimisation of root architecture provides a viable strategy to improve nutrient and water uptake efficiency and maintain crop productivity under water-limiting and nutrient-poor conditions. We know little, however, about the genetic control of root development in wheat, a crop supplying 20% of global calorie and protein intake. To improve our understanding of the genetic control of root development in wheat, we conducted a high-throughput screen for variation in seminal root number using an exome-sequenced hexaploid wheat mutant population. The screen identified eight independent mutants with homozygous and stably inherited altered seminal root number (*arn*) phenotypes, referred to as *arn1* to *arn8*. One mutant, *arn1*, displays a recessive extra seminal root number phenotype, while six mutants (*arn2*, *arn4* to *arn8*) show dominant lower seminal root number phenotypes. We show that the lower seminal root number phenotype of *arn2*, *arn4* to *arn8* originates from defects in the formation and activation of seminal root primordia. Segregation analysis in F<sub>2</sub> populations suggest that the *arn1* phenotype is controlled by multiple genes whereas the *arn2* phenotype fits a 3:1 mutant:wild-type segregation ratio characteristic of dominant single gene action. This work highlights the potential to use the sequenced wheat mutant population as a forward genetic resource to uncover novel variation in agronomic traits, such as seminal root architecture. Characterisation of the mutants and identification of the genes defining this variation should aid our understanding of root development in wheat.

## INTRODUCTION

The 1960's Green Revolution demonstrated the impact that changes to plant architecture in major crops like wheat and rice can have on increasing food production (Hedden 2003). While the Green Revolution focused on improving shoot architecture, it did not optimise root architecture, in part because selection was primarily for performance under management regimes involving high rates of fertiliser application (Lynch 2007). In addition to providing anchorage, the root is the main channel for water and nutrient uptake in crops and serves as an interface for symbiotic interaction with the soil microbiome. Roots are therefore often considered as the hidden and neglected other-half of plant architecture and have not been a direct target for selection during early wheat domestication and in modern wheat breeding programmes (Waines and Ehdaie 2007). In many environments, water-availability is the main factor defining crop rotations and performance. Projections on future climate forecast more variable weather events relating to the timings and intensity of precipitations which could negatively affect food security (Cattivelli et al. 2008). Optimising root system architecture (RSA) for improved nutrient and water uptake under these uncertain scenarios provides a rational approach to help achieve future food and nutrition security.

The wheat root system is comprised of two main root types, seminal (embryonic) and nodal (post-embryonic) roots, that develop at different times and perform important yet different functions. The seminal root system develops from the root primordia in the embryo of a germinating wheat seed and is comprised of a primary root that emerges first followed by two pairs of secondary seminal roots that emerge sequentially. As the first root type that emerges, seminal roots are entirely responsible for nutrient and water uptake in seedlings. Seminal roots are therefore important for seedling vigour and early plant establishment which determines competitiveness against weeds. Nodal roots on the other hand are shoot-borne



and develop soon after tillering to provide anchorage and support resource uptake especially during the reproductive stage of wheat growth.

Seminal roots may remain functionally active through to the reproductive stage and may grow up to 2 m in length (Sanguineti et al. 2007; Manschadi et al. 2013). They have been shown to have similar nutrient uptake efficiency as nodal roots in wheat and contribute to yield potential especially under conditions of low soil moisture where nodal roots may not grow (Weaver and Zink 1945; Sanguineti et al. 2007; Sebastian et al. 2016). Given their importance, seminal root traits, such as angle and number, have been linked to adaptive responses under water limiting conditions (Manschadi et al. 2008; Cane et al. 2014; Golan et al. 2018). Steep seminal root angle has been associated with increased soil water exploration at depth which is beneficial in drought condition where topsoil moisture is depleted (Richard et al. 2015; Olivares-Villegas et al. 2007; Manschadi et al. 2008).

Genetic variation for seminal root number exists among wheat genotypes. Typically, most wheat cultivars develop between three to six seminal roots (Araki and Iijima 2001). A few quantitative trait loci (QTL) have been identified to underlie variation in seminal root number in wheat germplasm (Atkinson et al. 2015; Maccaferri et al. 2016; Ren et al. 2012; Sanguineti et al. 2007; Ma et al. 2017; Iannucci et al. 2017). However, unlike other cereals (e.g. rice, maize) only one gene controlling root system architecture (RSA), *VRN1* (Voss-Fels et al. 2018), has been identified in wheat.

This delay in identifying genetic loci controlling root traits is most likely due to a series of factors, which make genetic analyses in wheat difficult. Bread wheat is a hexaploid plant with a relatively large (15 Mb) and repeat-rich (>85%) genome comprised of three homoeologous sub-genomes (A, B and D). High sequence similarity in the coding region of these sub-genomes results in high levels of genetic redundancy that mask the phenotypic effects of underlying natural variation for many traits, including RSA traits (Uauy et al. 2017). Also, the

“out-of-sight” nature and extreme phenotypic plasticity of roots under native field conditions makes root phenotyping difficult, cumbersome and time-consuming.

The use of induced variation has proven useful to uncover novel phenotypes and dissect genetic pathways underlying complex phenotypes in plants (Parry et al. 2009). Our current understanding of the genetic determinants regulating root development in many cereals have almost entirely stemmed from the isolation and characterisation of mutants defective in one or more RSA traits (Reviewed in Coudert et al. 2010; Hochholdinger et al. 2018; Marcon et al. 2013). Genetic variation for seminal root number in modern wheat germplasm has been defined to broad QTL which makes their genetic dissection difficult and their use in breeding limited. Exploiting induced variation present in mutant populations represents an alternative strategy to identify variation that can be used to improve RSA.

Mutation analyses, however, have not hitherto been exploited for studying the genetic architecture of root development in wheat, most likely due to the genetic redundancy often seen in polyploids (Krasileva et al. 2017; Uauy et al. 2017). The recent development of an *in-silico* platform for the rapid identification of mutations in 1,200 mutants of the UK hexaploid wheat cultivar Cadenza now makes large-scale reverse and forward genetic investigation of traits more feasible in wheat (Krasileva et al. 2017). Progress has also been made on the root phenomics front, with the development of fast, low-cost, and flexible two-dimensional (2D) root phenotyping pipelines with sufficient throughput for phenotyping large populations (Selvara et al. 2013; Atkinson et al. 2015)

Taking advantage of these new developments, we conducted a forward genetic screen for variation in seminal root number using a subset of the exome-sequenced mutant population in the Cadenza background. From this work, we describe the isolation and morphological, anatomical and genetic characterisation of mutants with decreased and increased numbers of seminal roots.

# MATERIALS AND METHODS

## Mutant Population

The hexaploid wheat TILLING population previously developed by ethyl methanesulfonate (EMS) treatment of a UK bread wheat cultivar - Cadenza (Krasileva et al. 2017; Rakszegi et al. 2010) was used for this study. Part of this population, 663 mutants, was used in this study. All the mutants used show greater than 90% field germination rate. To ensure homogeneity of phenotype and reduce the masking effect of segregating background mutations, single spikes harvested from field-grown M<sub>4</sub> plants were individually threshed and derived M<sub>5</sub> seeds were used for the forward screen.

## High-throughput seminal root phenotyping

*Primary Screen:* To phenotype seminal root traits of the Cadenza mutant population, we developed a 2D root phenotyping platform based on the protocol described by Atkinson et al. (2015) with some modifications to increase the throughput from 360 to 1,800 seedlings per run. In brief: Lines were first size-stratified as having either large, medium or small-sized seeds by sieving the seeds through two sets of calibrated graduated sieves with 2.8 mm and 3.35 mm mesh sizes. Large-sized seeds were collected above the 3.35 mm sieve, medium-sized seeds collected between the 2.8 mm and 3.35 mm mesh, and small-sized seeds were collected below the 2.8 mm sieve. Seeds (15 – 20 per line) were surface sterilized by rinsing in 5% (v/v) Sodium Hypochlorite (Sigma Aldrich, UK) for 10 mins and were rinsed with water three times before being imbibed in 1.75 mL of water for 5 days at 4°C to ensure uniform germination. Germinated seeds (with seed coat ruptured) were placed crease facing down into individual growth pouches made from a sheet of germination paper (21.5 cm x 28 cm; Anchor Paper Company, St Paul, MN, USA) clipped to a black polythene sheet (22 cm x 28

cm, 75  $\mu$ m thickness, Cransford Polythene LTD, Suffolk, UK) using an acrylic rod and 18 mm fold clip (Figure 1). The growth pouches were suspended in an upright position in plastic storage boxes (120 cm x 27 cm x 36 cm, Really Useful Product, West Yorkshire, UK) with 60 pouches per box. The sides of the box were covered in black plastic sticky back cover film to block out light from the roots of the developing seedlings. The bottom of each box was filled with 10 L of half-strength Hoaglands growth solution containing (Hoagland and Arnon 1950):  $\text{NH}_4\text{H}_2\text{PO}_4$ , 0.6 g;  $\text{Ca}(\text{NO}_3)_2$ , 3.3 g;  $\text{MgSO}_4$ , 1.2 g;  $\text{KNO}_3$ , 1.0 g;  $\text{H}_3\text{BO}_3$ , 14.3 mg;  $\text{Cu}_2\text{SO}_4$ , 0.4 mg;  $\text{MnCl}_2(\text{H}_2\text{O})_4$ , 9.1 mg;  $\text{MoO}_3$ , 0.1 mg;  $\text{ZnSO}_4$ , 1.1 mg;  $\text{KHCO}_3$ , 2.0 g, Ferric Tartrate, 2.8 g. The base of each pouch was suspended in the growth solution to supply nutrients to the developing seedling through capillary action. A randomised complete block design was adopted with each line replicated 10 times across different boxes (block). The phenotyping boxes were placed in a controlled environment room under long day conditions with 16h light (250–400 nmol) at 20°C, 8h darkness at 15°C and at 70% relative humidity. After 7 days of growth, pouches were taken out of the phenotyping box; placed on a copy stand and the black plastic sheet covering the germination paper was gently pulled back to reveal the roots. Images of the roots were taken with a Nikon D3400 DSLR Camera fitted to the copy stand. Phenotyping of the mutant population was split over five experiments. The same phenotyping set-up was used for the validation experiments (phenotyping of three additional spikes) and to characterise  $M_6$  and  $F_1$  progenies.

*Secondary Screen:* A secondary screen was carried out using a subset of the lines used in the primary screen. From each line, 10 visually uniform  $M_5$  seeds were selected and placed onto moist filter paper in a 90 mm round petri dish. Petri dishes were wrapped in aluminium foil to exclude light and placed at 4°C for 2 days, seeds were placed crease side down into individual CYG seed germination pouches (Mega-International, Minnesota, USA) with the

bottom removed to allow wicking of growth solution from a reservoir of media. Pouches were wrapped in aluminium foil in batches of 5 to exclude light from the roots and were placed upright in a reservoir of full strength Hoaglands No 2 growth solution ( $\text{NH}_4\text{H}_2\text{PO}_4$ , 115.03 mg;  $\text{Ca}(\text{NO}_3)_2$ , 656.4 mg;  $\text{MgSO}_4$ , 240.76 mg;  $\text{KNO}_3$ , 606.6 mg;  $\text{H}_3\text{BO}_3$ , 2.86 mg;  $\text{Cu}_2\text{SO}_4$ , 0.08 mg;  $\text{MnCl}_2(\text{H}_2\text{O})_4$ , 1.81 mg;  $\text{MoO}_3$ , 0.016 mg;  $\text{ZnSO}_4$ , 0.22 mg; Ferric Tartrate, 5 mg. per Litre). Pouches were placed in long day conditions (as above) and were allowed to grow for 5 days before roots were imaged. For imaging, pouches were placed onto a copy stand; the front of the pouch carefully removed, and the root system imaged using a Sony Cybershot DSC-RX100. Plants were screened in rounds of twenty lines with a total of 200 plants per round.

Image analysis: High-resolution images captured from the phenotyping were pre-processed (rotated, cropped and compressed) using ImageJ (<https://imagej.nih.gov/index.html>) and Caesium image compressor before being processed in RootNav (Pound et al. 2013). Captured root architectures were imported into RootNav viewer database for measurement of RSA traits using standard RootNav functions.

### **Anatomical characterisation of seminal root primordia**

Embryos from mature dry grains were fixed in FAA solution (10% formaldehyde, 5% acetic acid, 50% ethanol, and 35% distilled water by volume) overnight and dehydrated at room temperature in a graded ethanol series (30 min each, in 50%, 70%, 90%, 95%, and 100% ethanol). Then, embryos were cleared in xylene, embedded in paraffin and sectioned (5  $\mu\text{M}$ ) using a microtome (Leica Biosystems, Germany). Cross sections were de-paraffinized with histoclear, rehydrated and stained with Harris Hematoxylin. A stereo microscope (SZX16, Olympus, Tokyo, Japan) was used for imaging.

## Statistical analysis

All statistical analyses were performed in R 3.5.1 (R Core Team 2018) and Minitab 17 statistical software. Statistically significant root architectural difference in the primary screening experiment was determined by ANOVA using a Dunnett's comparison within each phenotyping batch with the Cadenza plants in each batch used as controls. Adjusted probability values of  $\leq 0.05$  were considered statistically significant. Statistically significant root architectural difference in the validation experiment as well as in the  $M_6$  and  $F_1$  phenotyping experiments were based on Student's t-test comparison of individual spike/line to the Cadenza control.

Seeds of mutant lines reported in this study can be ordered through the SeedStor site at [www.seedstor.ac.uk](http://www.seedstor.ac.uk). Supplemental materials are available at *FigShare*. Table S1 contains information on mutants with significantly different seminal root number phenotypes to Cadenza. Table S3 contains information on all the mutants phenotyped in both the primary and secondary screen. Table S3 contains information on summary ANOVA statistics of seminal root number comparison in the  $M_6$  and  $F_1$  generation.

## RESULTS

### Identifying induced variation for seminal root number in hexaploid wheat

We developed a rapid root phenotyping platform suitable for large-scale phenotyping at a throughput of 1,800 seedling per run (Figure 1). Using this platform, we performed a screen for variation in seminal root number using 663 seed-size stratified (small, medium and large)  $M_5$  mutants from the exome-sequenced Cadenza TILLING population. Cadenza mainly

displayed five seminal roots ( $4.9 \pm 0.05$ ) including a primary seminal root ( $SR_1$ ), as well as first ( $SR_{2,3}$ ) and second ( $SR_{4,5}$ ) pairs of seminal root (Figure 2A). We observed variation in seminal root number in the mutant population, with seminal root number ranging from 1 to 7 in individual plants and mean seminal root number per mutant ( $n \geq 4$  plants per mutant) ranging from 2.9 to 5.9 (Figure 2B). Consistent with Cadenza seminal root architecture, 82% of the mutants phenotyped had a modal seminal root number of 5.

Seed size groups showed significant difference in seminal root number ( $P < 0.0001$ ) and total root length ( $P < 0.0001$ ) with mutants with large and medium-sized grains having an average seminal root number of 4.7 and 4.4, respectively, and total root length of 483.2 mm and 322.8 mm, respectively (Figure 2C-D). We observed a significant positive correlation ( $R^2 = 0.31$ ,  $P < 0.0001$ ) between the number of seminal roots and the total root length in the population.

Dunnnett's multiple comparison identified 52 mutants with significantly different number of seminal roots relative to the Cadenza control within each of the three seed size groups (Table S2). Five of these mutants had significantly higher number of seminal root with mean seminal root number ranging from 5.7 to 5.9 and modal seminal root number of 6 per mutant (Table S1). The higher seminal root phenotype is mainly driven by the development of an extra root, hereafter referred to as  $SR_6$ . The remaining 47 mutants showed significantly lower number of seminal roots with mean seminal root number permutant of 2.9 to 4.1 and modal seminal root number between 3 and 5.

To further assess these lines, we phenotyped a subset (398 mutants) of the primary population in a secondary screen. This included 33 of the 52 mutants with significantly different seminal root number to Cadenza (four higher and 29 lower root count mutants). Details of each individual mutant line phenotyped in both the primary and secondary screens are presented in Table S2. We observed a significant positive correlation between seminal

root number measurements in the primary and secondary screen ( $R^2 = 0.39$ ;  $P < 0.001$ ; Figure 2B). The heritability estimate of the seminal root measurement across the two screens was 0.77 suggesting a strong heritable genetic effect in the determination of seminal root number in the mutant population. We confirmed the phenotypes of three of the four higher root number mutants identified in the primary screen; these lines displayed mean seminal root number of 5.1 to 5.5 in the secondary screen. However, only 20 of the 29 lower root number mutants displayed fewer number of seminal roots (less than 4 roots) than Cadenza in the secondary screen. We subsequently selected all three higher and 20 lower root number mutants with consistent phenotype in both screens for further phenotypic validation.

# ***altered root number (arn)* mutants show stable homozygous seminal root number phenotypes**

To validate the selected mutants, we phenotyped seeds from three additional  $M_5$  spikes. These  $M_5$  spikes originate from successive seed bulking of multiple  $M_3$  and  $M_4$  plants. Selecting three separate spikes increases the probability of phenotyping plants with independent background mutations thereby providing robust biological replications to examine the stability of the mutation effects and segregation patterns (homozygous or heterozygous). As controls, we also phenotyped additional spikes for two mutant lines that did not show any significant seminal root number difference in the primary and secondary screens.

For eight of the selected mutants, including a higher root number and seven lower root number mutants, we observed the altered seminal root number phenotype in the three additional spikes (Figure S1). This suggests that the phenotypes of these mutants are robust, consistent, and controlled by mutations that were homozygous in the original single  $M_2$  plant



from which the population was derived. We subsequently named these eight mutants as **altered root number mutants** (*arn*): *arn1* for the higher root count mutant and *arn2* to *arn8* for the lower root count mutants (Table 1, Figure 3). It is noteworthy that the *arn* mutants show varying degree of phenotypic penetrance (percentage of plants displaying a phenotype) with *arn3* having the least penetrant phenotype and was therefore not characterised further. Six other mutants show alteration in seminal root number, but only in two of the three additional spikes examined (Table 1). These most likely represent mutations that were heterozygous in the initial single M<sub>2</sub> plant and that have segregated in the subsequent generations.

We further characterized the *arn* mutants from 1 to 7 days post germination (dpg) to examine when the *arn* phenotype was first visible and to identify the seminal root type (primary, first pair or second pair) defective in these mutants (Figure 4). Cadenza showed fully emerged primary root (SR<sub>1</sub>) at 1 dpg, while the first (SR<sub>2,3</sub>) and second pairs (SR<sub>4,5</sub>) of seminal roots emerged at 3 and 5 dpg, respectively. Similar to Cadenza, *arn4* to *arn8* developed the primary and first pair of seminal roots at 1 dpg and 3 dpg, respectively, but are defective in the development of the second pair of seminal roots. Contrary to this, *arn1* shows a faster rate of seminal root development relative to Cadenza with the primary, first and second pair of seminal roots emerged by 3 dpg and an extra sixth root emerged at 7 dpg. *arn2* showed a strong dormancy phenotype and was not included in this experiment.

### **Lower root number *arn* mutants involve defects in primordia development and growth**

Seminal roots emerge from root primordia that form in the embryo of a developing seed. Differential activation of root primordia of SR<sub>4,5</sub> has been shown to underlie variation in seminal root number in young seedlings (Golan et al., 2018). We therefore examined if the seminal root phenotypes of the lower root number *arn* mutants (*arn2*, *arn4* to *arn8*) originate from altered root primordia activity or rather defects in primordia development. Cadenza (WT)

consistently develop five fully formed root primordia (Figure 5). All the lower root number *arn* mutants examined showed altered root primordia development compared to Cadenza, with the SR<sub>4</sub> or SR<sub>4,5</sub> primordia either absent or reduced in size (Figure 5). In addition, primordia activity was altered in the mutants, as all mutants had greater number of primordia compared to the number of roots recorded in the seedlings. Notably, *arn5* to *arn8* also have significantly smaller embryo compared to Cadenza (Figure S2).

### Genetic characterisation of the *arn* phenotypes

To understand the transgenerational stability and mode of inheritance of the *arn* mutants, we characterized M<sub>6</sub> and F<sub>1</sub> progenies derived from crosses of the *arn* mutants to Cadenza. Like the M<sub>5</sub> phenotype, M<sub>6</sub> progenies of *arn1* showed significantly ( $P < 0.0001$ ) increased number of seminal roots compared to Cadenza with an average root number of 5.73 and more than 73% of the plants having six roots (Figure 6). F<sub>1</sub> progenies of *arn1* x Cadenza all had five seminal roots, similar to Cadenza ( $P = 0.19$ ; Figure 6), suggesting that the *arn1* phenotype originates from a recessive mutation or is caused by a combination of loci segregating independently.

The M<sub>6</sub> plants of *arn2*, *arn4* to *arn7* all showed a significantly lower number of seminal roots ( $P < 0.05$ ) compared to Cadenza with mean root number ranging from of 2.6 to 4.6 (Figure 6). The F<sub>1</sub> progenies of these mutants also showed significantly ( $P < 0.01$ ) lower number of seminal roots compared to Cadenza, similar to their M<sub>5</sub> parents, with an average root number of between 3.2 and 3.9 (Figure 6). This suggests that the *arn2*, *arn4* to *arn7* phenotypes are caused by dominant mutations. Unlike its M<sub>5</sub> parent, the *arn2* x Cadenza F<sub>1</sub> did not show any reduced germination, suggesting that the dormancy phenotype of *arn2* segregates independently of its altered root number.

We further characterized  $F_2$  progenies of the higher root number mutant, *arn1*, and the lower root number mutant, *arn2*. We used the chi-square test-statistic to test the goodness of fit of the inheritance pattern of *arn1* and *arn2* phenotypes to those consistent with segregation of single recessive and single dominant traits, respectively. The phenotype of *arn1*  $F_2$  progenies (238) was not consistent with the expected 3:1 Cadenza:*arn1* phenotype segregation ratio of a single recessive gene ( $\chi^2 = 52.71$ ,  $P < 0.0001$ ), suggesting that multiple genes may be responsible for *arn1* phenotype. In contrast, the segregation pattern of the *arn2*  $F_2$  population (51 plants) is consistent with the 3:1 *arn2*:Cadenza segregation ratio expected of a single dominant gene ( $\chi^2 = 0.53$ ,  $P = 0.4669$ ), suggesting that the *arn2* phenotype is caused by a single dominant gene.

## DISCUSSION

Mutant analyses have played a key role in the identification of genes controlling key stages of root development. For instance, all eight genes identified to control root architecture in maize were identified via mutant analyses (Hochholdinger et al. 2018; Marcon et al. 2013), including *RTCS*, *RTCL*, *RUM1* and *BIGE1* with seminal root phenotypes (Taramino et al. 2007; Suzuki et al. 2015; von Behrens et al. 2011; Xu et al. 2015). Despite the buffering effect of genetic redundancy that often mask single homoeolog mutations in polyploid wheat, our study highlights the usefulness of forward screens to identify heritable variation for root development traits in wheat.

***arn* mutants are useful for characterising known and novel RSA genes in wheat**

The use of a sequenced mutant population in this study provided the opportunity to examine the presence of mutations in candidate genes from other species. For example, the higher seminal root number phenotype of *arn1* was similar to the phenotype of maize *bige1* (Suzuki et al. 2015) mutants. However, *in-silico* examination of mutations on the EnsemblPlant database show that *arn1* (Cadenza0900) does not harbour any mis-sense or non-sense mutations in the coding sequences of the three wheat homoeologs of *BIGE1* - *TraesCS4A02G350200*, *TraesCS5B02G522900* and *TraesCS5D02G521600*. It is also noteworthy that the extra SR<sub>6</sub> root phenotype of *arn1* bears some similarity to the sixth root phenotype reported in some tetraploid wheat varieties (Sanguineti et al. 2007), suggesting that the gene underlying *arn1* might also be responsible for variation in the development of the sixth seminal root in natural populations.

Similarly, the lower seminal root number phenotypes of *arn2* to *arn8* are similar to the phenotypes of maize *rtcs* and *rtcl* mutations (Taramino et al. 2007), and their orthologous rice mutants (Liu et al. 2005; Inukai et al. 2005). *In-silico* examination of these coding regions in the *arn2* to *arn8* mutants revealed that *arn8* (Cadenza1273) contains a functional mutation in *TraesCS4D01G312800*, one of the three wheat homoeologs of *RTCS*, *RTCL* and *ARL1/CRL1*. *arn8* harbours a G765A mutation in *TraesCS4D01G312800* producing a premature termination codon which results in a truncated 265 amino acid (aa) protein instead of the 289 aa native protein. Further molecular and genetic characterisation will be required to test if the G765A mutation in Cadenza1273 is responsible for the *arn8* phenotype. However, this exemplifies the power of combining the sequenced mutant information with known candidate genes and now a fully annotated wheat genome (Appels et al. 2018). *arn2* to *arn7* do not contain any functional EMS mutations in the three wheat homoeologs of *RTCS*, *RTCL* and *ARL1/CRL1* and therefore might represent new variation controlling seminal root development in cereals. It is important to note that these *in-silico* investigations

are restricted to mutations in the coding region of the wheat genome and we cannot rule out that mutations in promoter regions of these candidate genes might be responsible for some of the *arn* mutants identified.

### **Relationship between grain size and seminal root traits**

Size stratification of seeds in our study allowed an examination of the relationship between grain size and root architecture. We observed a positive effect of grain size on root length and number. Grain size account for 72% of the total variance in root length in the mutant population consistent with the rationale that bigger grains have more carbohydrate reserve to support faster root elongation. We also noticed a weak but positive effect of grain size on the number of seminal roots developed. Grain size effect on seedling traits, including seminal root traits, can be attributed to constituent components – embryo and/or endosperm (Bremner et al. 1963; Meyer 1976). Interestingly, four of the lower root number mutants (*arn5* – *arn8*) have smaller embryo compare to Cadenza. However, it is premature to conclude without further genetic analyses that the small embryo of these mutants directly affects their seminal root number phenotypes. More so, grain size only accounts for a small proportion (9%) of the total variance in root number in our study, suggesting that seed size per se is not a major determinant of root number. This is further underlined by the fact that differently sized wild-type Cadenza seeds show similar root number averages. In support of this, a recent report suggests that variation in seminal root number between wheat species mainly originates from genetic factors in the embryo rather than broad differences in seed morphology (Golan et al. 2018).

Although informative, the qualitative stratification of grain size (large, medium and small) adopted in this study does not allow a quantitative modelling of grain size effect on root traits. We propose that a finer calibration and partitioning of grain size measurement into constituent parameters (width, length, height) and tissue (embryo and endosperm) components (Brinton and Uauy 2018) will allow for a finer understanding of the effects of these seed size components on root architecture.

## **Developmental and genetic characterisation of seminal root development**

Natural variation in wheat seminal root number have been shown to originate from defects in root primordia development in the embryo and/or differential activation of developed primordia to form fully emerged seminal roots (Golan et al. 2018). Our anatomical characterisation of intact non-imbibed seeds of the lower root number mutants (*arn2*, *arn4* to *arn8*) highlight a tendency for these mutants to develop less than five root primordia, whereas wild-type Cadenza plants consistently develop five root primordia. In addition, these mutants form even fewer number of seminal roots than the root primordia they developed, suggesting that some primordia in these mutants might be dormant/inactive or arrested soon after activation. Together these results highlight both primordia development and activation as two important development check points in the formation of seminal root in wheat.

All the *arn* mutants develop SR<sub>1</sub> and SR<sub>2,3</sub> but show defects in the development of SR<sub>4,5</sub> as in (*arn2* – *arn8*), or develop an extra root (SR<sub>6</sub>) as in *arn1*. We could not recover mutants defective in either SR<sub>1</sub> nor SR<sub>2,3</sub>. This likely suggests that the developments of the different seminal root types are under distinct genetic control, with SR<sub>1</sub> and SR<sub>2,3</sub> being more conserved than SR<sub>4,5</sub> and SR<sub>6</sub>. This notion is supported by reports that SR<sub>4,5</sub> show only negligible contribution to water uptake and does not confer any beneficial fitness under well-

watered conditions (Golan et al. 2018). It is however possible that SR<sub>4,5</sub> and indeed SR<sub>6</sub> may contribute significantly to nutrient and water uptake under resource-limiting conditions where increase in root surface area maximises soil exploration. Detailed field physiological evaluation will be required to better understand the cost-benefit relationship of the altered seminal root phenotype of the *arn* mutants and evaluate the potential of these mutations to improve resource uptake efficiency in plants.

Despite the high plasticity associated with root traits, we obtained a high heritability estimate for seminal root number measurements across different experiments, similar to estimates reported in other studies (Maccaferri et al. 2016; Ma et al. 2017). While these high heritability may be due to the controlled hydroponic environment used in these experiments (Figure 1), it nonetheless demonstrates that seminal root number is a stable phenotype under strong genetic control and can be targeted for selection to improve RSA in wheat breeding programmes. There is also evidence to suggest that seminal root number phenotypes observed in hydroponic conditions are transferrable to soil conditions (Richard et al. 2015) and might therefore be useful under field conditions.

Most of the lower root number mutations (*arn2*, *arn4* to *arn7*) isolated in this study show a dominant mode of action and for *arn2* we further documented this by the 3:1 segregation ratios in the *arn2* F<sub>2</sub> populations. The dominant nature of these phenotypes makes it impossible to test the allelism of these mutations and as such we cannot rule out the possibility that these mutations are allelic and are controlled by the same gene. Unlike the lower root number mutations, *arn1* shows a recessive, multigenic phenotype that might point to high redundancy or multiple layers of gene regulation against the development of higher (more than five) numbers of seminal roots in wheat. More detailed genetic characterisation and mapping will be required to better dissect the genetic control of these traits.

451

## 452 **Future outlook**

453 Our work provides a complementary approach to the study of natural variation in dissecting  
454 the genetic control of seminal root development in wheat. The isolation of these mutants  
455 represents an important first step in identifying the genetic determinants controlling wheat  
456 seminal root development and growth. These will be followed by extensive genetic  
457 characterisation to map these mutations to defined chromosomal positions, examine  
458 interactions between the alleles and identify the causal gene(s) underlying the *arn*  
459 phenotypes.

460

## 461 **ACKNOWLEDGEMENT**

462 We would like to thank Dr Jonathan Atkinson, Prof Malcolm Bennett, Chloe Riviere and  
463 Guiditta Giordani for technical advice and assistance in the setting up the high-throughput 2D  
464 root screen and Andrew Davis for help with root imaging. This research is supported by the  
465 UK Biotechnology and Biological Sciences Research Council (BBSRC) Designing Future  
466 Wheat programme (BB/P016855/1), a BBSRC DTP award to RK, the Chief Scientist of the  
467 Israel Ministry of Agriculture and Rural Development grant (#12-01-0005), and the U.S.  
468 Agency for International Development Middle East Research and Cooperation grant (# M34-  
469 037).

470

471

## 472 **LITERATURE CITED**



Appels, R., K. Eversole, C. Feuillet, B. Keller, J. Rogers *et al.*, 2018 Shifting the limits in wheat research and breeding using a fully annotated reference genome. *Science* 361 (6403).

Araki, H., and M. Iijima, 2001 Deep Rooting in Winter Wheat: Rooting Nodes of Deep Roots in Two Cultivars with Deep and Shallow Root Systems. *Plant Production Science* 4 (3):215-219.

Atkinson, J.A., L.U. Wingen, M. Griffiths, M.P. Pound, O. Gaju *et al.*, 2015 Phenotyping pipeline reveals major seedling root growth QTL in hexaploid wheat. *Journal of Experimental Botany* 66 (8):2283-2292.

Bremner, P., R. Eckersall, and R. Scott, 1963 The relative importance of embryo size and endosperm size in causing the effects associated with seed size in wheat. *The Journal of Agricultural Science* 61 (1):139 - 145.

Brinton, J., and C. Uauy, 2018 A reductionist approach to dissecting grain weight and yield in wheat. *Journal of Integrative Plant Biology* 0 (ja).

Cane, M.A., M. Maccaferri, G. Nazemi, S. Salvi, R. Francia *et al.*, 2014 Association mapping for root architectural traits in durum wheat seedlings as related to agronomic performance. *Mol Breed* 34 (4):1629-1645.

Cattivelli, L., F. Rizza, F.-W. Badeck, E. Mazzucotelli, A.M. Mastrangelo *et al.*, 2008 Drought tolerance improvement in crop plants: An integrated view from breeding to genomics. *Field Crops Research* 105 (1):1-14.

Coudert, Y., C. Perin, B. Courtois, N.G. Khong, and P. Gantet, 2010 Genetic control of root development in rice, the model cereal. *Trends Plant Sci* 15 (4):219-226.

Golan, G., E. Hendel, E.G.E. Méndez, N. Schwartz, and Z. Peleg, 2018 Activation of seminal root primordia during wheat domestication reveals underlying mechanisms of plant resilience. *Plant, Cell & Environment* 41 (4):755-766.

Hedden, P., 2003 The genes of the Green Revolution. *Trends in Genetics* 19 (1):5-9.

Hoagland, D.R., and D.I. Arnon, 1950 The water-culture method for growing plants without soil. *Circular. California Agricultural Experiment Station* 347 (2):32.

Hochholdinger, F., P. Yu, and C. Marcon, 2018 Genetic Control of Root System Development in Maize. *Trends Plant Sci* 23 (1):79-88.

Iannucci, A., D. Marone, M.A. Russo, P. De Vita, V. Miullo *et al.*, 2017 Mapping QTL for Root and Shoot Morphological Traits in a Durum Wheat x *T. dicoccum* Segregating Population at Seedling Stage. *International Journal of Genomics* 2017:17.

Inukai, Y., T. Sakamoto, M. Ueguchi-Tanaka, Y. Shibata, K. Gomi *et al.*, 2005 Crown rootless1, which is essential for crown root formation in rice, is a target of an AUXIN RESPONSE FACTOR in auxin signaling. *Plant Cell* 17 (5):1387-1396.

Krasileva, K.V., H.A. Vasquez-Gross, T. Howell, P. Bailey, F. Paraiso *et al.*, 2017 Uncovering hidden variation in polyploid wheat. *Proceedings of the National Academy of Sciences* 114 (6):E913-E921.

Liu, H., S. Wang, X. Yu, J. Yu, X. He *et al.*, 2005 ARL1, a LOB-domain protein required for adventitious root formation in rice. *The Plant Journal* 43 (1):47-56.

Lynch, J.P., 2007 Roots of the Second Green Revolution. *Australian Journal of Botany* 55 (5):493-512.

Ma, J., W. Luo, H. Zhang, X.-H. Zhou, N.-N. Qin *et al.*, 2017 Identification of quantitative trait loci for seedling root traits from Tibetan semi-wild wheat (*Triticum aestivum* subsp. *tibetanum*). *Genome* 60 (12):1068-1075.

Maccaferri, M., W. El-Feki, G. Nazemi, S. Salvi, M.A. Canè *et al.*, 2016 Prioritizing quantitative trait loci for root system architecture in tetraploid wheat. *Journal of Experimental Botany* 67 (4):1161-1178.

Manschadi, A.M., G.L. Hammer, J.T. Christopher, and P. deVoi, 2008 Genotypic variation in seedling root architectural traits and implications for drought adaptation in wheat (*Triticum aestivum* L.). *Plant and Soil* 303 (1):115-129.

Manschadi, A.M., G. Manske, and P.L.G. Vlek, 2013 Root Architecture and Resource Acquisition – Wheat as a Model Plant, pp. 1 -22 in *Plant Roots: The Hidden Half*, edited by A. Eshel and T. Beeckman. CRC Press, Taylor & Francis Group.

Marcon, C., A. Paschold, and F. Hochholdinger, 2013 Genetic control of root organogenesis in cereals. *Methods Mol Biol* 959:69-81.

- Meyer, W.S., 1976 Seminal roots of wheat : manipulation of their geometry to increase the availability of soil water and to improve the efficiency of water use, pp. 217 in *Faculty of Agricultural Science* University of Adelaide.
- Olivares-Villegas, J.J., M.P. Reynolds, and G.K. McDonald, 2007 Drought-adaptive attributes in the Seri/Babax hexaploid wheat population. *Functional Plant Biology* 34 (3):189-203.
- Parry, M.A.J., P.J. Madgwick, C. Bayon, K. Tearall, A. Hernandez-Lopez *et al.*, 2009 Mutation discovery for crop improvement. *Journal of Experimental Botany* 60 (10):2817-2825.
- Pound, M.P., A.P. French, J.A. Atkinson, D.M. Wells, M.J. Bennett *et al.*, 2013 RootNav: Navigating Images of Complex Root Architectures. *Plant Physiology* 162 (4):1802-1814.
- R Core Team, 2018 R: A Language and Environment for Statistical Computing. R Foundation for Statistical Computing, Vienna, Austria.
- Rakszegi, M., B.N. Kisgyörgy, K. Tearall, P.R. Shewry, L. Láng *et al.*, 2010 Diversity of agronomic and morphological traits in a mutant population of bread wheat studied in the Healthgrain program. *Euphytica* 174 (3):409-421.
- Ren, Y., X. He, D. Liu, J. Li, X. Zhao *et al.*, 2012 Major quantitative trait loci for seminal root morphology of wheat seedlings. *Molecular Breeding* 30 (1):139-148.
- Richard, C.A., L.T. Hickey, S. Fletcher, R. Jennings, K. Chenu *et al.*, 2015 High-throughput phenotyping of seminal root traits in wheat. *Plant Methods* 11 (1):13.
- Sanguineti, M.C., S. Li, M. Maccaferri, S. Corneti, F. Rotondo *et al.*, 2007 Genetic dissection of seminal root architecture in elite durum wheat germplasm. *Annals of Applied Biology* 151 (3):291-305.
- Sebastian, J., M.-C. Yee, W. Goudinho Viana, R. Rellán-Álvarez, M. Feldman *et al.*, 2016 Grasses suppress shoot-borne roots to conserve water during drought. *Proceedings of the National Academy of Sciences* 113 (31):8861-8866.
- Selvara, M.G., S. Ogawa, and M. Ishitani, 2013 Root Phenomics-New Windows to Understand Plant Performance and Increase Crop Productivity. *Journal of Plant Biochemistry & Physiology* 1:116.
- Suzuki, M., Y. Sato, S. Wu, B.-H. Kang, and D.R. McCarty, 2015 Conserved Functions of the MATE Transporter BIG EMBRYO1 in Regulation of Lateral Organ Size and Initiation Rate. *The Plant Cell* 27 (8):2288-2300.
- Taramino, G., M. Sauer, S.J. L., D. Multani, X. Niu *et al.*, 2007 The maize (*Zea mays* L.) *RTCS* gene encodes a LOB domain protein that is a key regulator of embryonic seminal and post-embryonic shoot-borne root initiation. *The Plant Journal* 50 (4):649-659.
- Uauy, C., B.B.H. Wulff, and J. Dubcovsky, 2017 Combining Traditional Mutagenesis with New High-Throughput Sequencing and Genome Editing to Reveal Hidden Variation in Polyploid Wheat. *Annual Review of Genetics* 51 (1):435-454.
- von Behrens, I., M. Komatsu, Y. Zhang, K.W. Berendzen, X. Niu *et al.*, 2011 Rootless with undetectable meristem 1 encodes a monocot-specific AUX/IAA protein that controls embryonic seminal and post-embryonic lateral root initiation in maize. *Plant J* 66 (2):341-353.
- Voss-Fels, K.P., H. Robinson, S.R. Mudge, C. Richard, S. Newman *et al.*, 2018 *VERNALIZATION1* Modulates Root System Architecture in Wheat and Barley. *Mol Plant* 11 (1):226-229.
- Waines, J.G., and B. Ehdaie, 2007 Domestication and Crop Physiology: Roots of Green-Revolution Wheat. *Annals of Botany* 100 (5):991-998.
- Weaver, J.E., and E. Zink, 1945 Extent and Longevity of the Seminal Roots Of Certain Grasses. *Plant Physiology* 20 (3):359-379.
- Xu, C., H. Tai, M. Saleem, Y. Ludwig, C. Majer *et al.*, 2015 Cooperative action of the paralogous maize lateral organ boundaries (LOB) domain proteins *RTCS* and *RTCL* in shoot-borne root formation. *New Phytol* 207 (4):1123-1133.

## Figure Legends

Figure 1: Root phenotyping set-up: (A) Growth pouch. (B) Phenotyping box containing growth pouch and nutrient solution at the bottom. (C) Root phenotyping in controlled environment room. (D) Camera mounted on copy stand for root imaging.

Figure 2: Variation in seminal root number in the Cadenza wheat mutant population. (A) Seminal root architecture of a Cadenza seedling showing the primary root ( $SR_1$ ) and the first ( $SR_{2,3}$ ) and second pairs of seminal roots ( $SR_{4,5}$ ). (B) Correlation of the seminal root number phenotypes observed in the primary and secondary screens. Only lines phenotyped in both screens are shown. The regression line from the two experiments (dotted diagonal line) is compared to a perfect correlation (solid line) between the experiments. (C-D) Distribution of the seminal root number (C) and total root length measurements (D) phenotypes observed in the primary screen across large and medium seed size groups. The top, bottom, and mid-line of the insert boxes represent the 75<sup>th</sup> percentile, 25<sup>th</sup> percentile and median of the distribution, respectively, while coloured dots represent the data points for wild-type Cadenza (black) and validated higher (red) and lower (white) root number mutants presented in Table 1.

Figure 3: *arn* mutants show homozygous seminal root number phenotypes. Seminal root number distribution in the *arn* mutants and Cadenza (WT) across four spikes phenotyped in the primary screen (spike 1) and validation experiments (spikes 2 to 4). The number of the seeds phenotyped from each spike ranged from four to ten.

Figure 4: *arn* mutants show altered SR<sub>4,5</sub> and SR<sub>6</sub> seminal root types phenotypes. Temporal characterization of the seminal root development of the *arn* mutants from 1 to 7 days post germination (dpg).

Figure 5: Number of seminal root primordia in *arn* mutants. Longitudinal cross sections of *arn* mutants prior to seed imbibition. The seminal root primordia of Cadenza are marked by asterisks.

Figure 6: Genetic mode of action of the *arn* mutants. Seminal root number distribution in M<sub>6</sub> and F<sub>1</sub> progenies of the *arn* mutants and Cadenza. The number of the seeds phenotyped for each line ranged from 9 to 27.

Table 1: Phenotypic summary of validated altered root number mutants with information on the mutation type and phenotype frequency in selected spikes.

| Type                        | Mutant      | <i>arn</i> name | Mean (Sem)  | Het/hom | Mut/Total |
|-----------------------------|-------------|-----------------|-------------|---------|-----------|
| Wild-type                   | Cadenza     |                 | 4.90 (0.05) | -       | -         |
| Higher Root<br>Count Mutant | Cadenza0927 |                 | 5.32 (0.09) | Het     | 3/4       |
|                             | Cadenza0173 |                 | 5.69 (0.08) | Het     | 3/4       |
|                             | Cadenza0900 | <i>arn1</i>     | 5.87 (0.05) | Hom     | 4/4       |
| Lower Root<br>Count Mutant  | Cadenza0393 | <i>arn5</i>     | 3.08 (0.04) | Hom     | 4/4       |
|                             | Cadenza0818 | <i>arn7</i>     | 3.11 (0.06) | Hom     | 4/4       |
|                             | Cadenza0062 | <i>arn2</i>     | 3.18 (0.17) | Hom     | 4/4       |
|                             | Cadenza1273 | <i>arn8</i>     | 3.18 (0.07) | Hom     | 4/4       |
|                             | Cadenza0369 | <i>arn4</i>     | 3.25 (0.09) | Hom     | 4/4       |
|                             | Cadenza0465 | <i>arn6</i>     | 3.25 (0.09) | Hom     | 4/4       |
|                             | Cadenza0904 |                 | 3.31 (0.13) | Het     | 3/4       |
|                             | Cadenza0122 |                 | 3.67 (0.16) | Het     | 3/4       |
|                             | Cadenza0335 | <i>arn3</i>     | 3.86 (0.19) | Hom     | 4/4       |
|                             | Cadenza0167 |                 | 3.88 (0.16) | Het     | 3/4       |

Mean is calculated from pooled root number counts of all four spikes except for lines with heterozygous phenotype, where was calculated from pool of spikes showing significant difference

Ⓐ

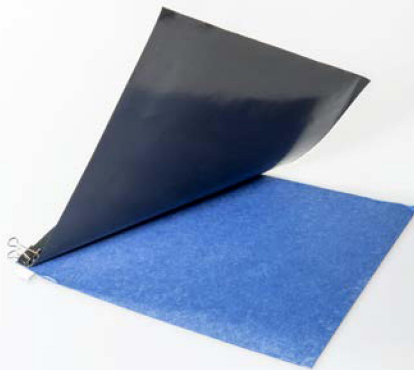

Ⓑ

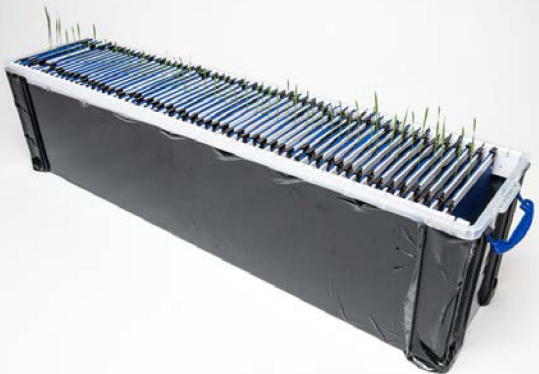

Ⓒ

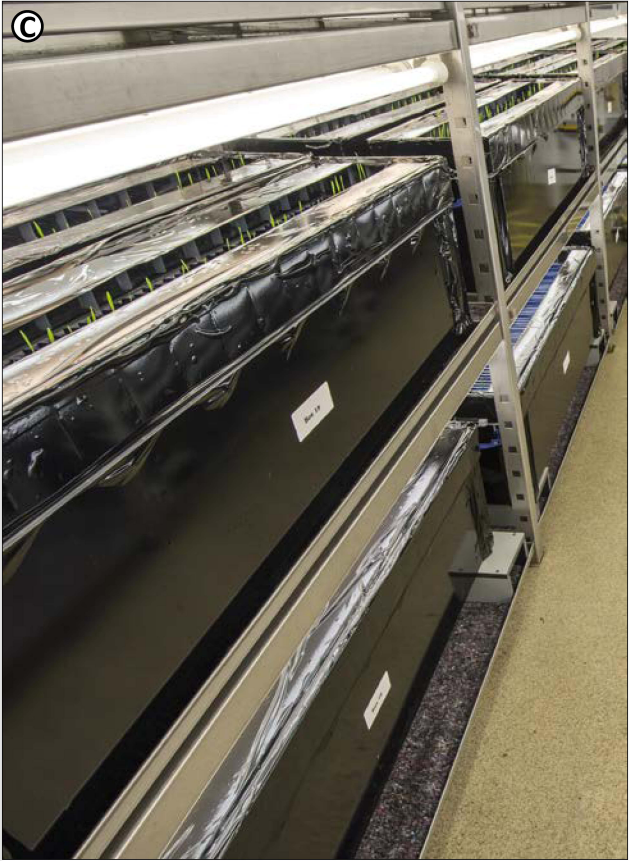

Ⓓ

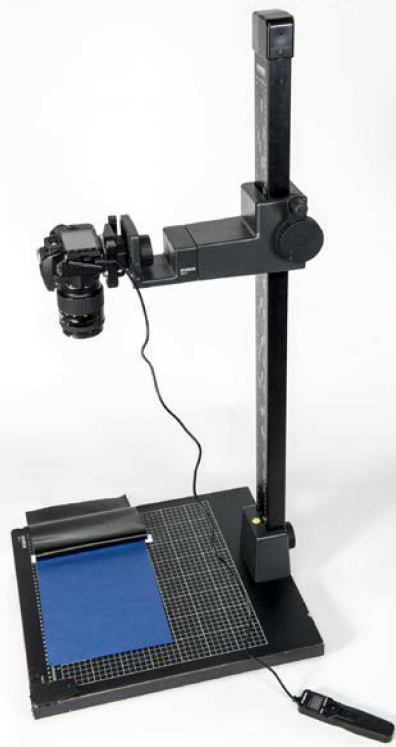



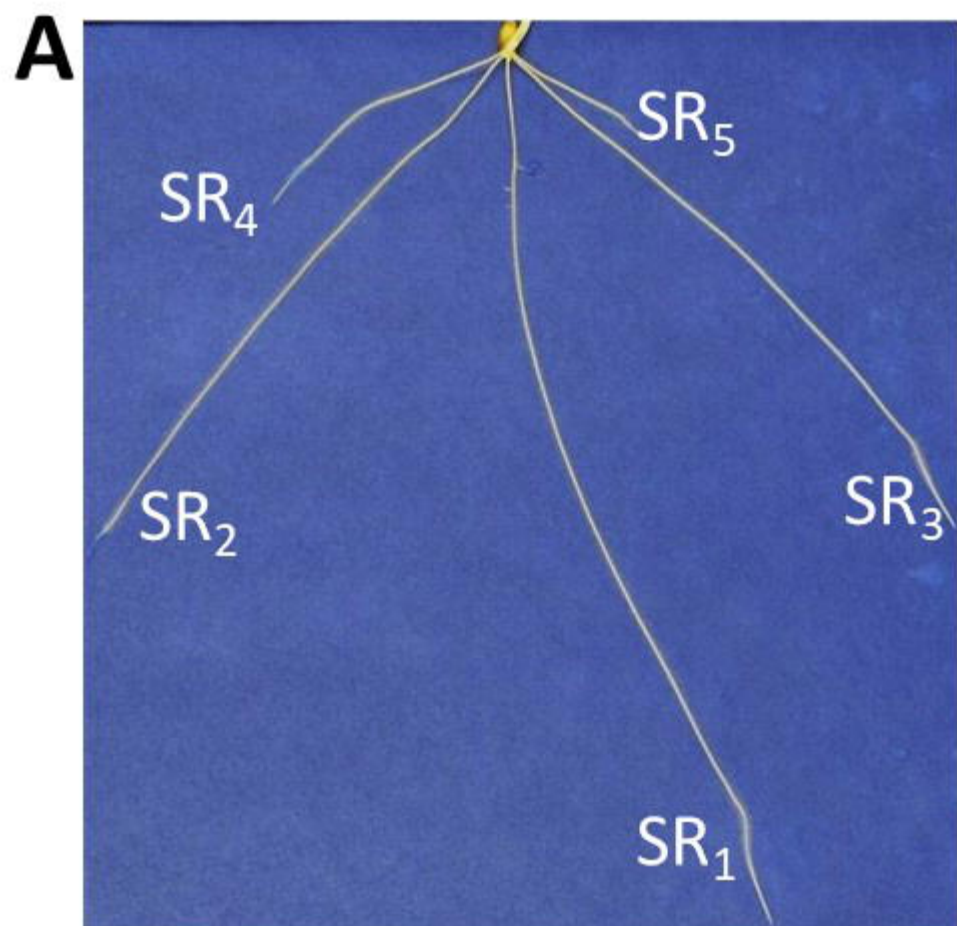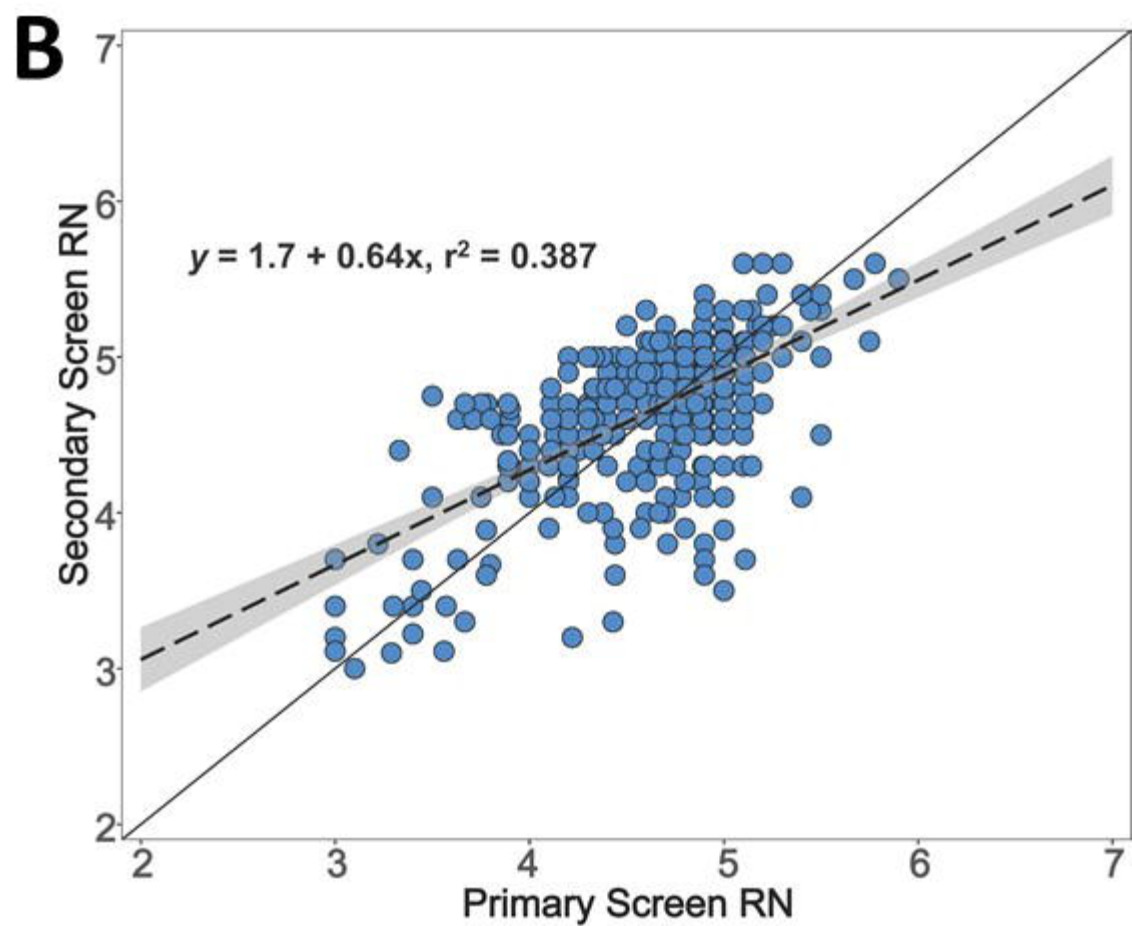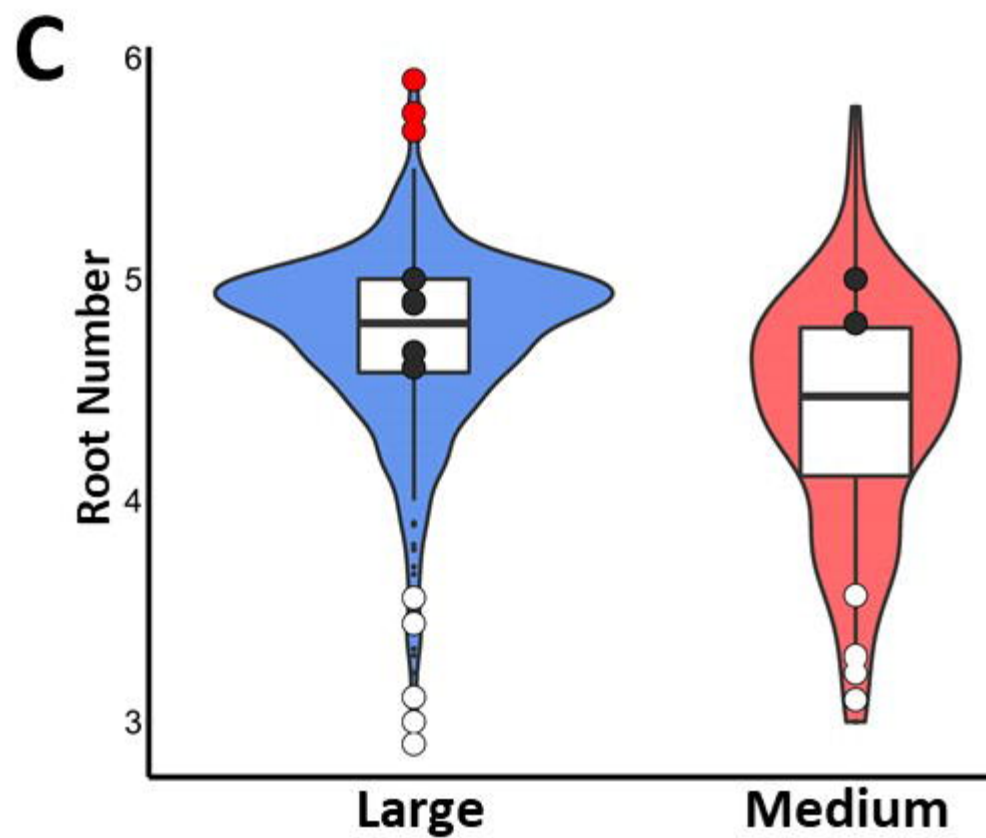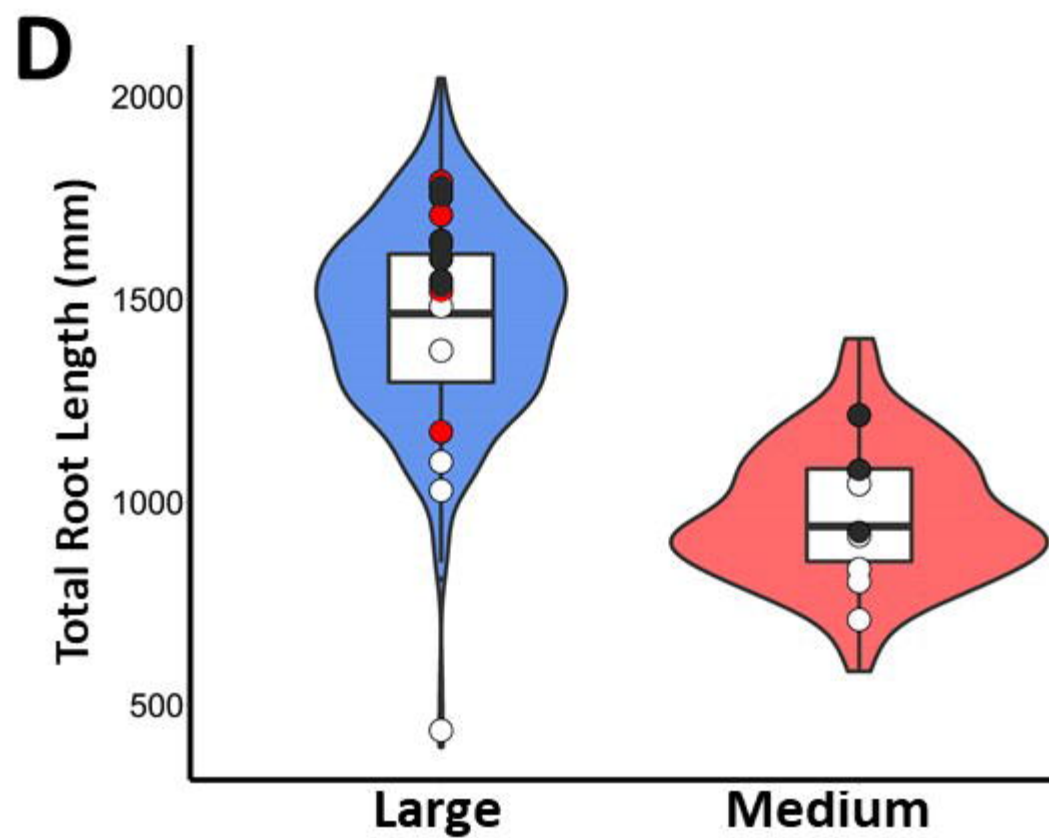

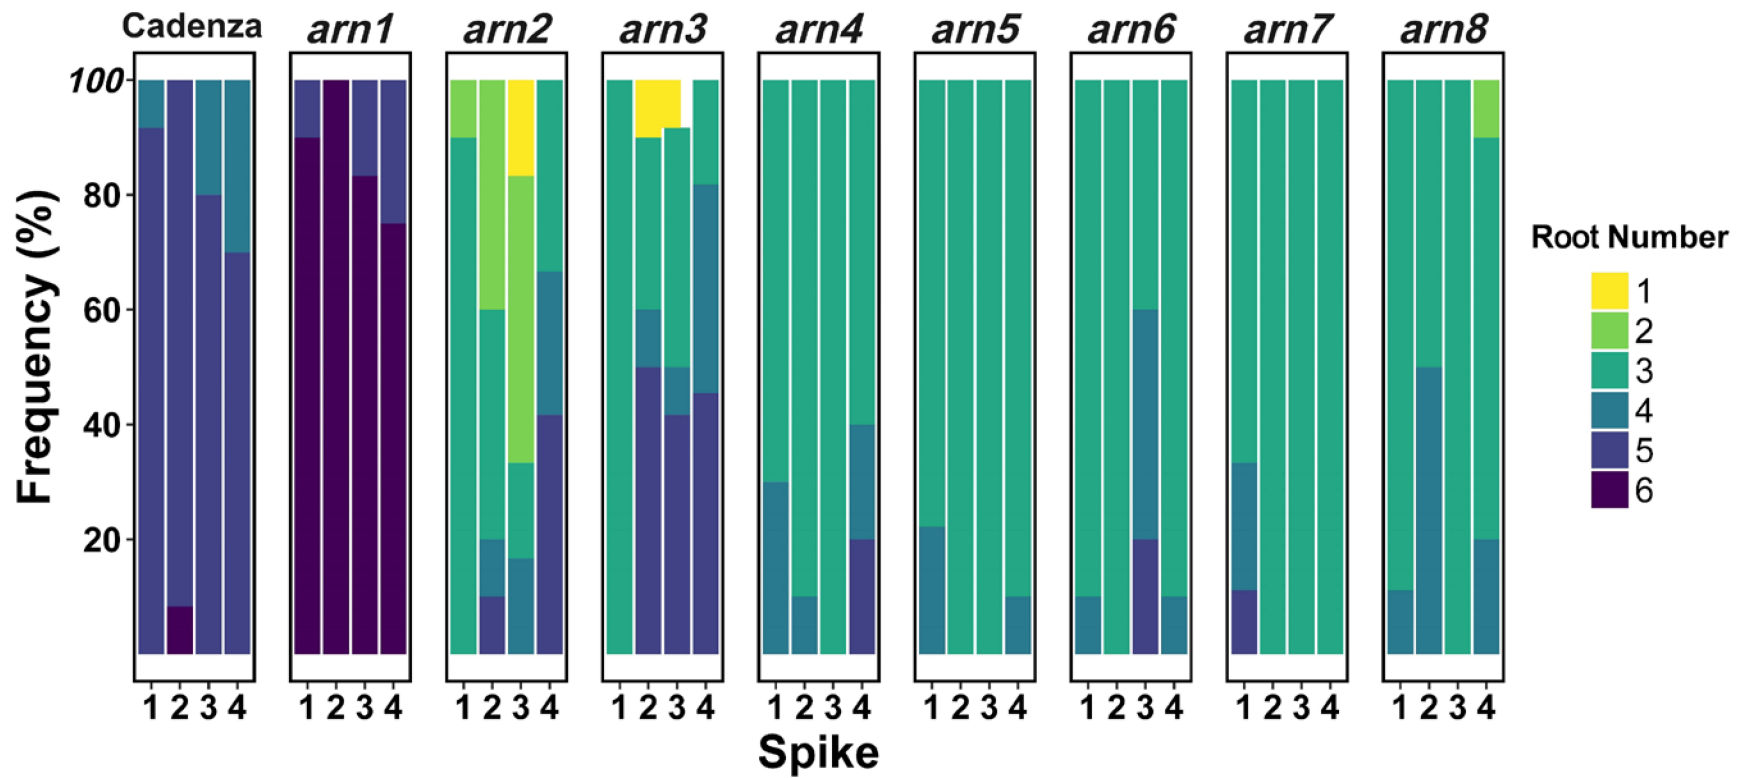



Days post germination (dpg)

1

3

5

7

Cadenza

*arn1*

*arn4*

*arn5*

*arn6*

*arn7*

*arn8*

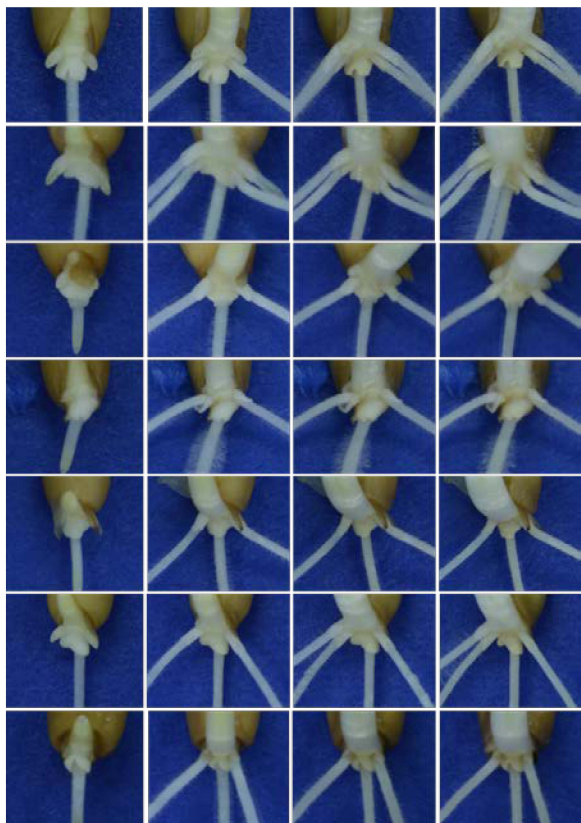

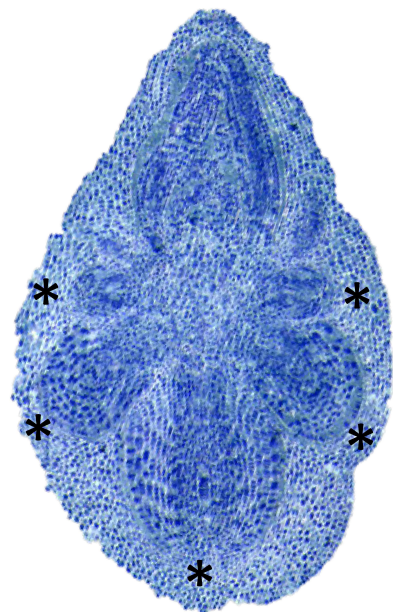

**Cadenza**

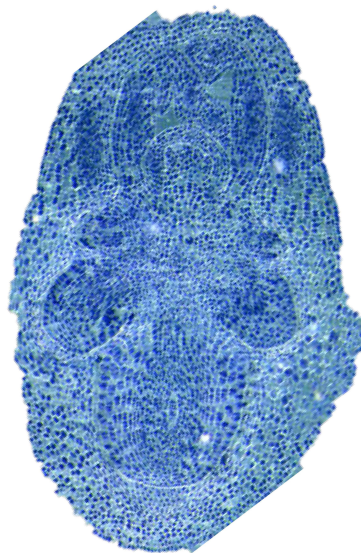

***arn2***

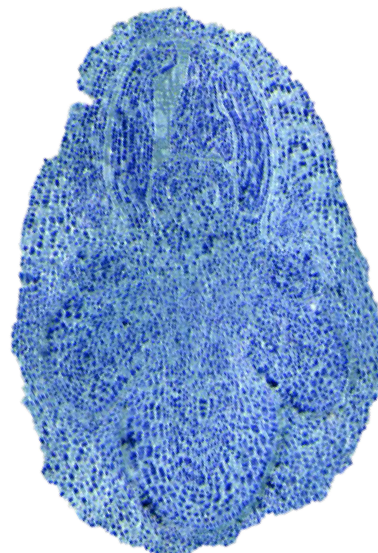

***arn4***

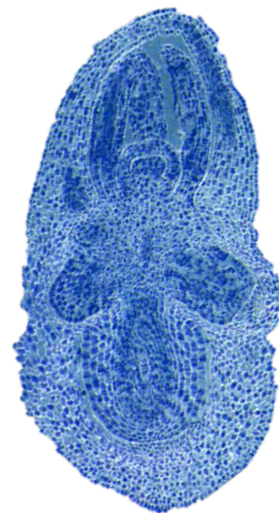

***arn5***

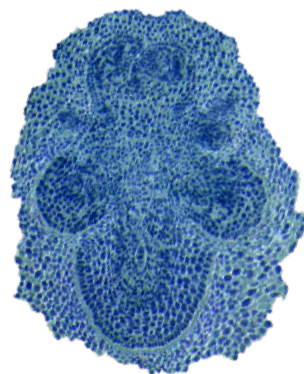

***arn6***

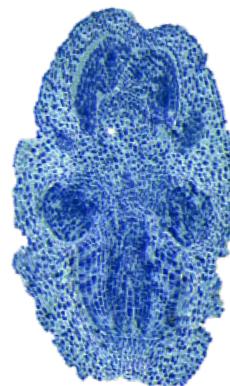

***arn7***

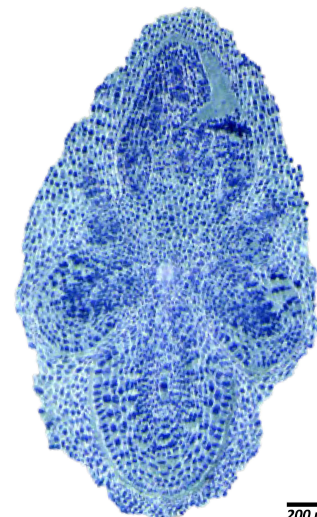

***arn8***

200  $\mu$ M

| Line        | Mean Primordia Count<br>(StDev) |
|-------------|---------------------------------|
| Cadenza     | 5.00 (-)                        |
| <i>arn2</i> | 4.50 (0.27)                     |
| <i>arn4</i> | 4.83 (0.16)                     |
| <i>arn5</i> | 3.90 (0.25)                     |
| <i>arn6</i> | 4.33 (0.33)                     |
| <i>arn7</i> | 3.75 (0.48)                     |
| <i>arn8</i> | 4.25 (0.31)                     |

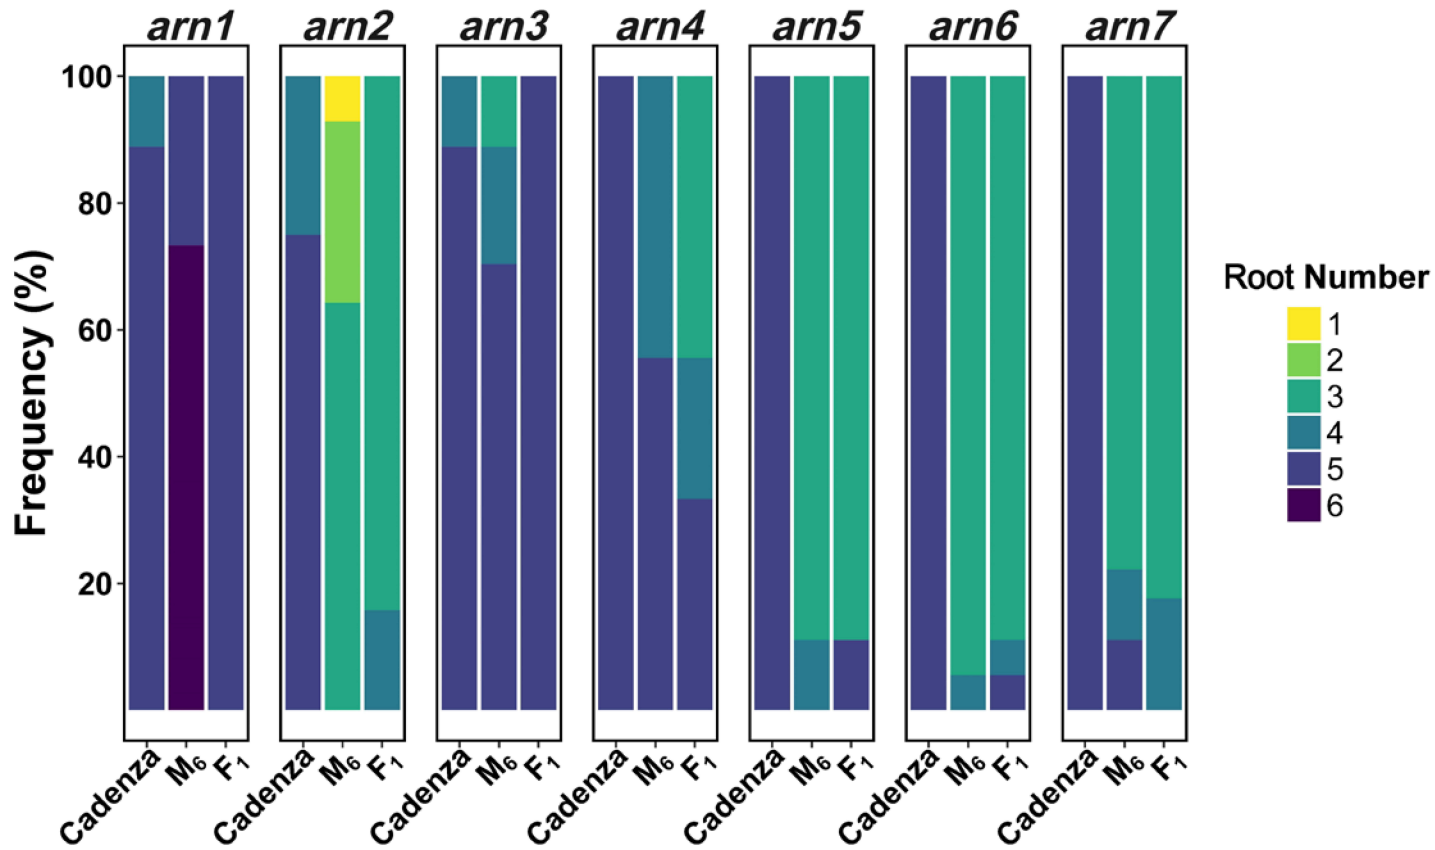

Source: http://biorxiv.org/content/10.1101/364018v2.full.pdf
